# Supplementary material for: Trends in Engagement With Opioid Use Disorder Treatment Among Medicaid Beneficiaries During the COVID-19 Pandemic
Source: PubMed Central journal article supplement (PMC8917419; doi:10.1001/jamahealthforum.2022.0093), 2022-03-11
Supplement: jamahealthforum-e220093-s001.pdf [file jamahealthforum-e220093-s001.pdf]

## Supplemental Online Content

Tilhou AS, Dague L, Saloner B, Beemon D, Burns M. Trends in engagement with opioid use disorder treatment among Medicaid beneficiaries during the COVID-19 pandemic. *JAMA Health Forum*. 2022;3(3):e220093. doi:10.1001/jamahealthforum.2022.0093

**eTable 1.** Sample Construction

**eTable 2.** Comparison of Analytic Sample to Underlying Population

**eTable 3.** Comparison of Current Cohort to an Alternative Future Staggered Cohort

**eAppendix 1.** Definition of Outcome Measures

**eAppendix 2.** Definition of Person-Week Measure

**eReferences**

This supplemental material has been provided by the authors to give readers additional information about their work.

## eAppendix1

**eTable 1. Sample Construction**

| <b>Inclusion/Exclusion Criterion</b>                                                                                                                                                    | <b>Unique Individuals</b> |
|-----------------------------------------------------------------------------------------------------------------------------------------------------------------------------------------|---------------------------|
| (1) Population: Individuals ages 18-64 with $\geq 1$ month parent/caretaker or childless adult eligibility between December 2018 – September 2020, and no eligibility due to pregnancy. | 513,157                   |
| (2) Continuous enrollment from December 2018 – September 2020                                                                                                                           | 115,638                   |
| (3) Diagnosis of OUD in any position on outpatient, inpatient, or emergency department claim, June 2018 – November 2018                                                                 | 6,435                     |

**eAppendix 2**

**eTable 2. Comparison of Analytic Sample to Underlying Population of Adult Medicaid Beneficiaries with at least one month of Parent/Caretaker or Childless Adult eligibility, December 2018 – September 2020**

|                           | (1)<br>Population<br><b>N= 513,157</b> | (2)<br>Continuously<br>Enrolled Sample<br><b>N=115,638</b> | (3)<br>Continuously Enrolled with<br>OUD (Analytic Sample)<br><b>N=6,435</b> |
|---------------------------|----------------------------------------|------------------------------------------------------------|------------------------------------------------------------------------------|
| Average # months enrolled | 14.43                                  | 22                                                         | 22                                                                           |
| Eligibility Category      |                                        |                                                            |                                                                              |
| Childless Adult           | 266,911 (52%)                          | 64,715 (56%)                                               | 3,974 (62%)                                                                  |
| Parents/Caretakers        | 201,288 (48%)                          | 50,923 (44%)                                               | 2,461 (38%)                                                                  |
| Age group                 |                                        |                                                            |                                                                              |
| 18-34                     | 49.86%                                 | 38.03%                                                     | 43.92%                                                                       |
| 35-49                     | 31.38%                                 | 37.08%                                                     | 45.05%                                                                       |
| >49                       | 18.31%                                 | 24.89%                                                     | 11.03%                                                                       |
| Race                      |                                        |                                                            |                                                                              |
| American Indian           | 2.04%                                  | 2.04%                                                      | 4.17%                                                                        |
| Asian                     | 3.08%                                  | 3.14%                                                      | 0.40%                                                                        |
| Black                     | 20.12%                                 | 18.72%                                                     | 7.10%                                                                        |
| Hispanic                  | 6.60%                                  | 5.95%                                                      | 4.53%                                                                        |
| Pacific Islander          | 0.10%                                  | 0.10%                                                      | 0.02%                                                                        |
| White                     | 54.90%                                 | 62.90%                                                     | 78.04%                                                                       |
| Multiracial               | 5.16%                                  | 3.28%                                                      | 3.69%                                                                        |
| Geography                 |                                        |                                                            |                                                                              |
| Urban                     | 69.23%                                 | 68.11%                                                     | 69.57%                                                                       |
| Rural                     | 22.59%                                 | 23.67%                                                     | 21.83%                                                                       |
| Missing                   | 8.18%                                  | 8.22%                                                      | 8.59%                                                                        |
| Education                 |                                        |                                                            |                                                                              |
| Less than High School     | 18.60%                                 | 18.35%                                                     | 20.99%                                                                       |
| High School or More       | 52.93%                                 | 54.92%                                                     | 61.99%                                                                       |
| Income                    |                                        |                                                            |                                                                              |
| <=50 FPL                  | 65.82%                                 | 72.40%                                                     | 85.53%                                                                       |
| 50-100% FPL               | 29.90%                                 | 27.60%                                                     | 14.47%                                                                       |
| >100% FPL                 | 4.29%                                  | 0.00%                                                      | 0.00%                                                                        |
| Missing                   | 0.01%                                  | 0.00%                                                      | 0.00%                                                                        |

**Notes:**

*Column (1) corresponds to the first row in eTable 1, Individuals ages 18-64 with >=1 month parent/caretaker or childless adult eligibility between December 2018 – September 2020, and no eligibility due to pregnancy. Column (2) corresponds to the second row in eTable 1, the subset of persons in the population with continuous enrollment from Dec 2018 – Sept 2020. Column (3) corresponds to the third row in eTable 1, the subset of the continuously enrolled sample with a diagnosis of OUD observed between June 2018-November 2018.ddd*

### eAppendix 3. Comparison of Current Cohort to an Alternative Future Staggered Cohort

To assess the generalizability of our findings, we compared the study cohort to an alternative cohort identified three months forward (identified by claims 09/2018-02/2019 instead of 06/2018-11/2018). Here we show that sociodemographic characteristics are similar across the two cohorts.

| <b>eTable 3. Characteristics of the Current (identified 06/18-11/18) and Alternative (identified 09/18-02/19) Cohorts</b> |                       |                           |
|---------------------------------------------------------------------------------------------------------------------------|-----------------------|---------------------------|
|                                                                                                                           | <b>Current Cohort</b> | <b>Alternative Cohort</b> |
|                                                                                                                           | N = 6,453<br>No. (%)  | N = 7,006<br>No. (%)      |
| Eligibility category                                                                                                      |                       |                           |
| Childless Adults                                                                                                          | 3986 (61.8)           | 4344 (62.0)               |
| Parents                                                                                                                   | 2467 (38.2)           | 2662 (38.0)               |
| Age group                                                                                                                 |                       |                           |
| 18-34                                                                                                                     | 43.89%                | 44.42%                    |
| 35-49                                                                                                                     | 45.08%                | 44.92%                    |
| >49                                                                                                                       | 11.03%                | 10.66%                    |
| Race and Ethnicity                                                                                                        |                       |                           |
| American Indian                                                                                                           | 4.17%                 | 4.30%                     |
| Asian                                                                                                                     | 0.40%                 | 0.39%                     |
| Black                                                                                                                     | 7.10%                 | 7.29%                     |
| Hispanic                                                                                                                  | 4.53%                 | 4.65%                     |
| Pacific Islander                                                                                                          | 0.02%                 | 0.03%                     |
| White                                                                                                                     | 78.04%                | 77.58%                    |
| Multiracial                                                                                                               | 3.69%                 | 3.80%                     |
| Sex                                                                                                                       |                       |                           |
| Female                                                                                                                    | 53.23%                | 53.07%                    |
| Geography                                                                                                                 |                       |                           |
| Urban                                                                                                                     | 70.26%                | 70.17%                    |
| Rural                                                                                                                     | 21.20%                | 21.42%                    |
| Education                                                                                                                 |                       |                           |
| Less than High School                                                                                                     | 20.99%                | 19.91%                    |
| High School or more                                                                                                       | 61.99%                | 61.99%                    |
| Income                                                                                                                    |                       |                           |
| <=50 FPL                                                                                                                  | 85.54%                | 85.43%                    |
| 50-100% FPL                                                                                                               | 14.46%                | 14.57%                    |
| >100% FPL                                                                                                                 | 0.00%                 | 0.00%                     |

|                                                                                                                                                                                                                                                                                                                                                                                                                    |  |
|--------------------------------------------------------------------------------------------------------------------------------------------------------------------------------------------------------------------------------------------------------------------------------------------------------------------------------------------------------------------------------------------------------------------|--|
| <p>Non-constant demographic variables are counted from first observed month in sample period. Abbreviations: OTP, opioid treatment program; UDT, urine drug test; FPL, federal poverty level.</p> <p>Missing, current cohort: race, 133 (2.1%), geography, 551 (8.5%), and education, 1156 (17.9%)</p> <p>Missing, alternative cohort: race, 137 (1.96%), geography, 589 (8.41%), and education, 1268 (18.10%)</p> |  |
|--------------------------------------------------------------------------------------------------------------------------------------------------------------------------------------------------------------------------------------------------------------------------------------------------------------------------------------------------------------------------------------------------------------------|--|

## eAppendix 4. Definition of Outcome Measures

### Opioid Treatment Program Engagement

We defined OTP engagement for each person week. This binary variable takes on a value of 1 if the individual had any claim during the week in which the provider taxonomy code for the billing provider was, 261QM2800X - Clinic/Center Methadone Clinic. Absent a claim with this type of billing provider, the OTP variable takes a value of 0.

### Office Based Opioid Treatment

We defined this binary variable for each person-week. We defined treatment as a prescription medication claim for buprenorphine or buprenorphine/naloxone. We determined the days supplied using the start and end dates of each prescription, and aligned those days supplied to each week. The OBOT variable takes on a value of 1 if the days supplied is  $\geq 1$  in the person-week and 0 otherwise. We followed the methods published by Medicaid Outcomes Distributed Research Network (MODRN) to address overlap in medications.<sup>1</sup>

### Urine Drug Test

We defined this binary variable for each person-week. We adopted the code set used by the MODRN to identify urine drug tests (shown below).<sup>1</sup>

"80100" "80101" "80102" "80103" "80104" "80299" "80300" "80301" "80302" "80303" "80304"  
"80305" "80306" "80307" "80320" "80321" "80322" "80323" "80324" "80325" "80326" "80327"  
"80328" "80329" "80330" "80331" "80332" "80333" "80334" "80335" "80336" "80337" "80338"  
"80339" "80340" "80341" "80342" "80343" "80344" "80345" "80346" "80347" "80348" "80349"  
"80350" "80351" "80352" "80353" "80354" "80355" "80356" "80357" "80358" "80359" "80360"  
"80361" "80362" "80363" "80364" "80365" "80366" "80367" "80368" "80369" "80370" "80371"  
"80372" "80373" "80374" "80375" "80376" "80377" "82660" "83925" "83992" "84311" "G0430"  
"G0431" "G0434" "G0477" "G0478" "G0479" "G0480" "G0481" "G0482" "G0483" "G0659" "G6045"  
"G6046" "G6053" "G6056" "G6058" "H0003" "H0048" "H0049" "Z2103" "Z2104" "Z2105" "Z2106"

We assigned a value of 1 to the UDT outcome variable if the UDT occurred in an outpatient setting and zero otherwise to increase the likelihood of capturing only UDTs associated with OBOT.

We used the following method to identify the UDT setting. We defined the setting to be an OTP if the subject had an outpatient visit where the billing provider was an OTP on the same day as the UDT. We defined the source to be an ED if the subject had an ED visit on the same day as the UDT. We defined the source to be inpatient if the subject was hospitalized on the date of the UDT. We defined the source to be outpatient if the subject had an outpatient visit for which the billing provider was *not* an OTP. We defined the source as unknown (and presumed outpatient) if on the date of the UDT, the subject did not have an OTP, ED, inpatient or outpatient encounter. If the person had a health care encounter at more than one setting on the date of the UDT, we assigned the setting in this order: OTP, inpatient, ED, outpatient.

## eAppendix 5. Definition of Person-Week

We divided each month into four quarters with the aim of having the same number of days per quarter within the month to the extent possible. We assigned days that could not be evenly divided across quarters within the month as shown below.

**eTable 4. Days per month-quarter for each calendar month**

| Months                                           | Total Days | # Days, Q1 | #Days, Q2 | #Days, Q3 | #Days, Q4 |
|--------------------------------------------------|------------|------------|-----------|-----------|-----------|
| Jan, March, May, July, August, October, December | 31         | 8          | 7         | 8         | 8         |
| April, June, September, November                 | 30         | 8          | 7         | 7         | 8         |
| February 2019                                    | 28         | 7          | 7         | 7         | 7         |
| February 2020                                    | 29         | 7          | 7         | 7         | 8         |

Since month-quarters can vary between 7 and 8 days, we controlled for this variation in our models. Results did not change for any of the outcomes. Thus, our final models are unscaled.

## REFERENCES

1. The Medicaid Outcomes Distributed Research Network (MODRN). Use of Medications for Treatment of Opioid Use Disorder Among US Medicaid Enrollees in 11 States, 2014-2018. *JAMA*. 2021;326(2):154-164. doi:10.1001/jama.2021.7374.
